# Supplementary material
Source: PubMed Central journal article supplement (PMC8678304)
Supplement: NIHMS1743495-supplement-1.pdf [file NIHMS1743495-supplement-1.pdf]

# Supplemental Materials

## Prenatal Maternal Phthalate Exposures and Trajectories of Childhood Adiposity from Four to Twelve Years

Kupsco, Allison\*<sup>1</sup>; Wu, Haotian<sup>1</sup>; Calafat, Antonia M<sup>2</sup>; Kioumourtzoglou, Marianthi-Anna<sup>1</sup>; Cantoral, Alejandra<sup>3</sup>; Tamayo-Ortiz, Marcela<sup>4</sup>; Pantic, Ivan<sup>5</sup>; Pizano- Zárata, Maria Luisa<sup>5</sup>; Oken, Emily<sup>6</sup>; Braun, Joseph M<sup>7</sup>; Deierlein, Andrea L<sup>8</sup>; Wright, Robert O<sup>9</sup>; Téllez-Rojo, Martha M<sup>10</sup>; Baccarelli, Andrea A<sup>1</sup>; Just, Allan C<sup>9</sup>.

<sup>1</sup>Department of Environmental Health Sciences, Mailman School of Public Health, Columbia University Medical Center, New York, NY, USA

<sup>2</sup>National Center for Environmental Health, Centers for Disease Control and Prevention, Atlanta, GA, USA.

<sup>3</sup> Health Department, Universidad Iberoamericana, Mexico City, Mexico

<sup>4</sup>Occupational Health Research Unit, Mexican Social Security Institute, Mexico City, Mexico

<sup>5</sup>National Institute of Perinatology, Mexico City, Mexico

<sup>6</sup>Division of Chronic Disease Research Across the Lifecourse, Department of Population Medicine, Harvard Medical School and Harvard Pilgrim Health Care Institute, Boston, Massachusetts, USA.

<sup>7</sup>Department of Epidemiology, Brown University, Providence, Rhode Island

<sup>8</sup>Department of Epidemiology, School of Global Public Health, New York University, New York, NY, USA

<sup>9</sup>Department of Environmental Medicine and Public Health, Icahn School of Medicine at Mount Sinai, New York, NY, USA

<sup>10</sup>Center for Research on Nutrition and Health, National Institute of Public Health, Cuernavaca, Morelos, Mexico

**Supplemental Table S1.** Limits of detection of the 15 phthalate metabolites ( $\mu\text{g/L}$ ).

| Class                        | Parent Phthalate                       | Phthalate Metabolite | Limit of Detection ( $\mu\text{g/L}$ ) | % Below the LOD |
|------------------------------|----------------------------------------|----------------------|----------------------------------------|-----------------|
| High Molecular Weight        | Di(2-ethylhexyl) phthalate (DEHP)      | MEHP                 | 0.8                                    | 7               |
|                              |                                        | MEOHP                | 0.2                                    | 0               |
|                              |                                        | MEHHP                | 0.4                                    | 0               |
|                              |                                        | MECPP                | 0.4                                    | 0               |
|                              | Di(2-ethylhexyl) terephthalate (DEHTP) | MECPTP               | 0.2                                    | 3.5             |
|                              | Di-isononyl phthalate (DiNP)           | MONP                 | 0.4                                    | 18.9            |
|                              |                                        | MCOP                 | 0.3                                    | 0.6             |
|                              | Di-isodecyl phthalate (DiDP)           | MCNP                 | 0.2                                    | 5.1             |
| Di-n-octyl phthalate (DOP)   | M CPP*                                 | 0.4                  | 14                                     |                 |
| Benzylbutyl phthalate (BBzP) | MBzP                                   | 0.3                  | 3.8                                    |                 |
| Low Molecular Weight         | Di-iso-butyl phthalate (DiBP)          | MHiBP                | 0.4                                    | 3.1             |
|                              |                                        | MiBP                 | 0.8                                    | 2.5             |
|                              | Di-n-butyl phthalate (DBP)             | MBP                  | 0.4                                    | 0               |
|                              |                                        | MHBP                 | 0.4                                    | 3.4             |
|                              | Diethyl phthalate (DEP)                | MEP                  | 1.2                                    | 0               |

\*Minor metabolite of DBP and non-specific metabolite of DOP and several other high molecular weight phthalates

**Supplemental Table S2.** Comparison of analysis population and excluded cohort population characteristics.

|                                       | Included in Analysis<br>(N = 514) |                    | Excluded from Analysis<br>(N = 272) |                    |
|---------------------------------------|-----------------------------------|--------------------|-------------------------------------|--------------------|
|                                       | N                                 | Mean $\pm$ SD or % | N                                   | Mean $\pm$ SD or % |
| Maternal Characteristics              |                                   |                    |                                     |                    |
| Age at Enrollment (years)             | 514                               | 27.7 $\pm$ 5.7     | 272                                 | 27.8 $\pm$ 5.3     |
| Pre-Pregnancy BMI ( $\text{kg/m}^2$ ) | 514                               | 26.4 $\pm$ 4.1     | 272                                 | 26.1 $\pm$ 4.2     |
| Education                             |                                   |                    |                                     |                    |
| More than High School                 | 126                               | 24.5               | 64                                  | 23.5               |
| High School                           | 180                               | 35                 | 94                                  | 34.6               |
| Less than High School                 | 208                               | 40.5               | 114                                 | 41.9               |
| Socioeconomic Status                  |                                   |                    |                                     |                    |
| High                                  | 52                                | 10.1               | 36                                  | 13.2               |
| Medium                                | 195                               | 37.9               | 96                                  | 35.3               |
| Low                                   | 267                               | 51.9               | 140                                 | 51.5               |
| Parity                                |                                   |                    |                                     |                    |
| Multi-parous                          | 320                               | 62.3               | 173                                 | 63.6               |
| Primi-parous                          | 194                               | 37.7               | 99                                  | 36.4               |
| Child Sex                             |                                   |                    |                                     |                    |
| Female                                | 258                               | 50.2               | 121                                 | 44.5               |
| Male                                  | 256                               | 49.8               | 151                                 | 55.5               |
| Birthweight (kg)                      | 514                               | 3.1 $\pm$ 0.42     | 272                                 | 3.1 $\pm$ 0.5      |
| Gestational Age at Birth              | 514                               | 38.4 $\pm$ 1.6     | 272                                 | 38.4 $\pm$ 1.6     |

**Supplemental Table S3.** Comparison of analysis population and original cohort population geometric mean 2<sup>nd</sup> and 3<sup>rd</sup> trimester phthalate metabolites (µg/L) and metabolite sums (µg/L of primary metabolite) adjusted for specific gravity in the PROGRESS birth cohort.

| Phthalate          | Included Analysis Population<br>(N = 514) |      |     |      |                  |                  | Excluded Cohort Population<br>(N = 272) |     |      |                  |                  | P      |
|--------------------|-------------------------------------------|------|-----|------|------------------|------------------|-----------------------------------------|-----|------|------------------|------------------|--------|
|                    | % < LOD                                   | GM   | SD  | Med  | 25 <sup>th</sup> | 75 <sup>th</sup> | GM                                      | SD  | Med  | 25 <sup>th</sup> | 75 <sup>th</sup> |        |
| ΣDEHP <sup>a</sup> | 7.0                                       | 95.0 | 2.2 | 98.8 | 58.4             | 157              | 104                                     | 1.8 | 103  | 68.8             | 147              | 0.11   |
| MEHP               | 7.0                                       | 5.5  | 2.5 | 5.6  | 3.2              | 10.1             | 6.2                                     | 2.1 | 6.3  | 3.9              | 9.2              | 0.04   |
| MEOHP              | 0                                         | 21.0 | 2.3 | 22.2 | 12.4             | 36.8             | 22.8                                    | 2.0 | 22.6 | 15.1             | 34.0             | 0.14   |
| MEHHP              | 0                                         | 19.8 | 2.3 | 20.7 | 11.9             | 33.7             | 21.9                                    | 1.9 | 21.8 | 14.9             | 31.5             | 0.08   |
| MECPP              | 0                                         | 44.7 | 2.1 | 45.3 | 27.7             | 74.3             | 48.3                                    | 1.8 | 47.4 | 32.2             | 68.0             | 0.14   |
| ΣDiBP <sup>b</sup> | 3.7                                       | 12.5 | 2.2 | 13.1 | 7.6              | 20.9             | 14.9                                    | 2.1 | 14.7 | 9.3              | 23.8             | <0.001 |
| MHiBP              | 3.1                                       | 3.4  | 2.2 | 3.5  | 2.0              | 6.0              | 4.1                                     | 2.2 | 4.0  | 2.4              | 6.4              | <0.01  |
| MiBP               | 2.5                                       | 9.2  | 2.2 | 9.6  | 5.6              | 15.7             | 11.0                                    | 2.1 | 10.7 | 6.8              | 17.2             | <0.01  |
| ΣDiNP <sup>c</sup> | 18.9                                      | 6.1  | 2.1 | 6.2  | 3.8              | 10.2             | 6.6                                     | 1.9 | 6.5  | 4.6              | 9.4              | 0.21   |
| MONP               | 18.9                                      | 1.4  | 2.3 | 1.4  | 0.9              | 2.5              | 1.6                                     | 2.0 | 1.5  | 1.1              | 2.3              | 0.11   |
| MCOP               | 0.6                                       | 4.6  | 2.1 | 4.5  | 2.8              | 7.6              | 4.9                                     | 1.9 | 4.8  | 3.3              | 6.9              | 0.24   |
| ΣDBP <sup>d</sup>  | 3.4                                       | 86.0 | 2.3 | 91.9 | 49.8             | 150              | 105                                     | 2.2 | 97.8 | 63.7             | 177              | <0.01  |
| MBP                | 0                                         | 79.3 | 2.3 | 84.8 | 45.7             | 137              | 96.4                                    | 2.2 | 90.6 | 58.3             | 164              | <0.01  |
| MHBP               | 3.4                                       | 6.9  | 2.5 | 7.4  | 3.9              | 13.0             | 8.7                                     | 2.3 | 8.7  | 5.0              | 14.9             | <0.01  |
| MBzP               | 3.8                                       | 5.0  | 2.8 | 5.2  | 2.4              | 9.9              | 6.7                                     | 2.3 | 6.4  | 4.0              | 11.3             | <0.01  |
| MECPTP             | 3.5                                       | 2.1  | 2.5 | 2.1  | 1.2              | 3.5              | 2.0                                     | 2.3 | 2.0  | 1.2              | 3.1              | 0.80   |
| MCNP               | 5.1                                       | 1.0  | 1.9 | 1.0  | 0.7              | 1.4              | 1.1                                     | 1.7 | 1.1  | 0.7              | 1.5              | 0.04   |
| M CPP              | 14.0                                      | 1.4  | 2.1 | 1.5  | 0.9              | 2.3              | 1.7                                     | 1.9 | 1.7  | 1.2              | 2.6              | <0.01  |
| MEP                | 0.0                                       | 144  | 3.2 | 139  | 66.1             | 309              | 159                                     | 2.9 | 152  | 72.0             | 318              | 0.25   |

Note: LOD: Limit of detection; GM: Geometric Mean; SD: Geometric Standard Deviation; Med.: Median; 25<sup>th</sup>: 25<sup>th</sup> Percentile; 75<sup>th</sup>: 75<sup>th</sup> Percentile; P: P value

<sup>a</sup>DEHP molar sum expressed as MECPP

<sup>b</sup>DiBP molar sum expressed as MiBP

<sup>c</sup>DiNP molar sum expressed as MCOP

<sup>d</sup>DBP molar sum expressed as MBP

**Supplemental Table S4.** Latent class growth model diagnostics for centered and non-centered trajectory classes.

|                           | Relative Entropy | Posterior Probability | Odds of Correct Classification |
|---------------------------|------------------|-----------------------|--------------------------------|
| Non-centered Trajectories | 0.746            |                       |                                |
| Low-Stable                |                  | 0.9                   | 9.2                            |
| High-High                 |                  | 0.91                  | 38                             |
| Low-High                  |                  | 0.82                  | 10.9                           |
| Centered Trajectories     | 0.927            |                       |                                |
| Stable                    |                  | 0.927                 | 19                             |
| High Increasing           |                  | 0.977                 | 140                            |
| Slow Increasing           |                  | 0.981                 | 87                             |

**Supplemental Table S5.** Overlap between centered and non-centered trajectory classes.

|                                      |            | Centered Trajectory Class |                 |                 |
|--------------------------------------|------------|---------------------------|-----------------|-----------------|
|                                      |            | Stable                    | High Increasing | Slow Increasing |
| Non-Centered<br>Trajectory C<br>lass | Low-Stable | 204                       | 2               | 54              |
|                                      | High-High  | 5                         | 84              | 18              |
|                                      | Low-High   | 12                        | 32              | 103             |

**Supplemental Table S6.** Numbers of male and female children in each trajectory class.

|                                  |                 | Female | Male |
|----------------------------------|-----------------|--------|------|
| Non-centered<br>trajectory class | Low-Stable      | 121    | 134  |
|                                  | Low-High        | 77     | 79   |
|                                  | High-High       | 60     | 43   |
| Centered<br>trajectory class     | Stable          | 118    | 103  |
|                                  | High Increasing | 59     | 56   |
|                                  | Slow Increasing | 81     | 97   |

**Supplemental Table S7.** Associations of the total phthalates mixture with overall adiposity and adiposity trajectories in male and female children as measured by quantile g-computation (N = 514).

| Model Type                | Outcome         | Sex    | Rate Ratio / Effect Estimate (95%CI) | P Value |
|---------------------------|-----------------|--------|--------------------------------------|---------|
| Non-Centered Trajectories | Low Stable      | Female | 1 (Ref)                              |         |
|                           |                 | Male   | 1 (Ref)                              |         |
|                           | High-High       | Female | 1.13 (0.85, 1.49)                    | 0.40    |
|                           |                 | Male   | 1.06 (0.74, 1.51)                    | 0.76    |
|                           | Low-High        | Female | 0.87 (0.66, 1.16)                    | 0.34    |
|                           |                 | Male   | 1.07 (0.84, 1.37)                    | 0.59    |
| Centered Trajectories     | Stable          | Female | 1 (Ref)                              |         |
|                           |                 | Male   | 1 (Ref)                              |         |
|                           | High Increasing | Female | 1.06 (0.8, 1.42)                     | 0.67    |
|                           |                 | Male   | 1.13 (0.87, 1.48)                    | 0.36    |
|                           | Slow Increasing | Female | 0.93 (0.73, 1.2)                     | 0.59    |
|                           |                 | Male   | 1.03 (0.87, 1.23)                    | 0.71    |
| Overall Adiposity         | BMI             | Female | 1.06 (0.89, 1.26)                    | 0.51    |
|                           |                 | Male   | 1 (0.84, 1.19)                       | 0.98    |
|                           | FMI             | Female | 1.14 (0.8, 1.62)                     | 0.46    |
|                           |                 | Male   | 1.07 (0.83, 1.38)                    | 0.6     |

|  |      |        |                |      |
|--|------|--------|----------------|------|
|  | WHtR | Female | 1 (0.99, 1.01) | 0.98 |
|  |      | Male   | 1 (0.99, 1.01) | 0.96 |

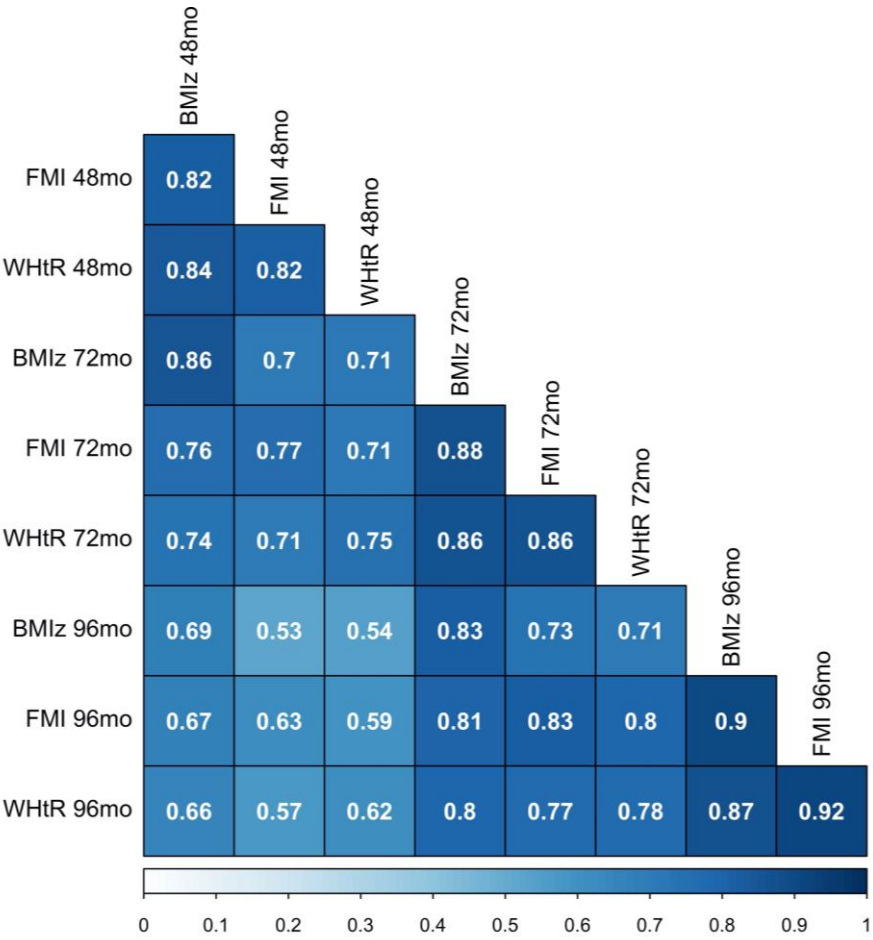

**Supplemental Figure S1.** Correlation plots between adiposity outcomes used in the present analysis. Gradient of cell indicates the strength of the Pearson correlation and the rho value is labeled in each cell.

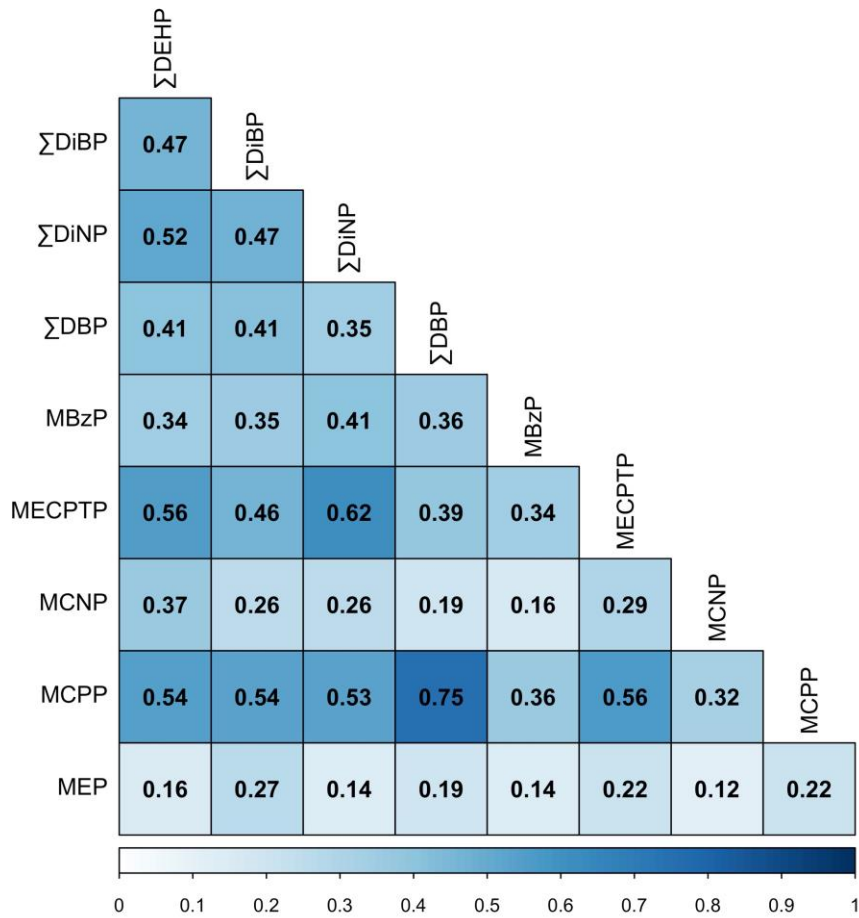

**Supplemental Figure S2.** Correlation plots between mean prenatal phthalate urinary biomarkers. Gradient of cell indicates the strength of the Pearson correlation and the rho value is labeled in each cell.

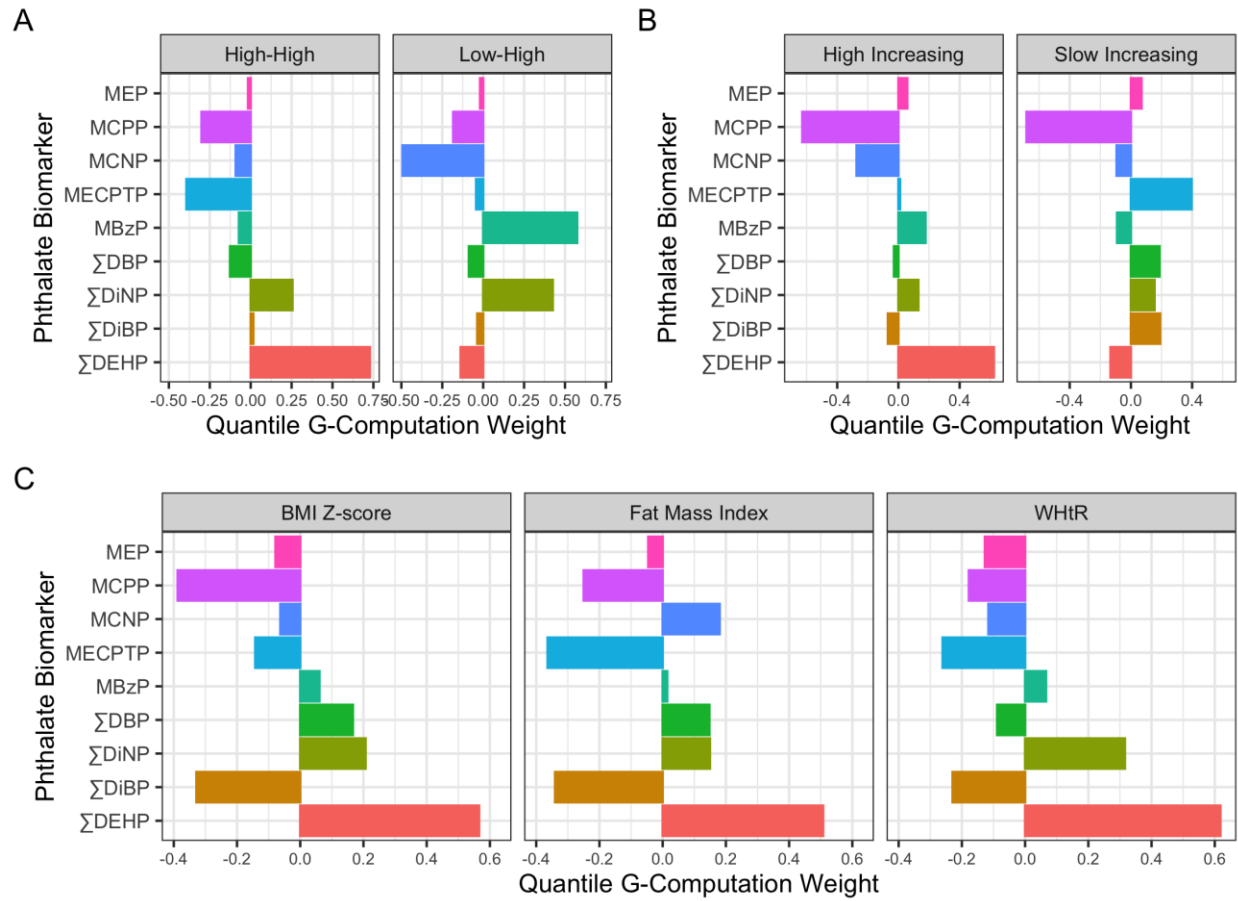

**Supplemental Figure S3.** Weights for associations of the total phthalates biomarker mixture with A) non-centered adiposity trajectories, B) centered adiposity trajectories, and C) longitudinal BMI Z-score, FMI and WHtR as measured by quantile g-computation (N = 514).

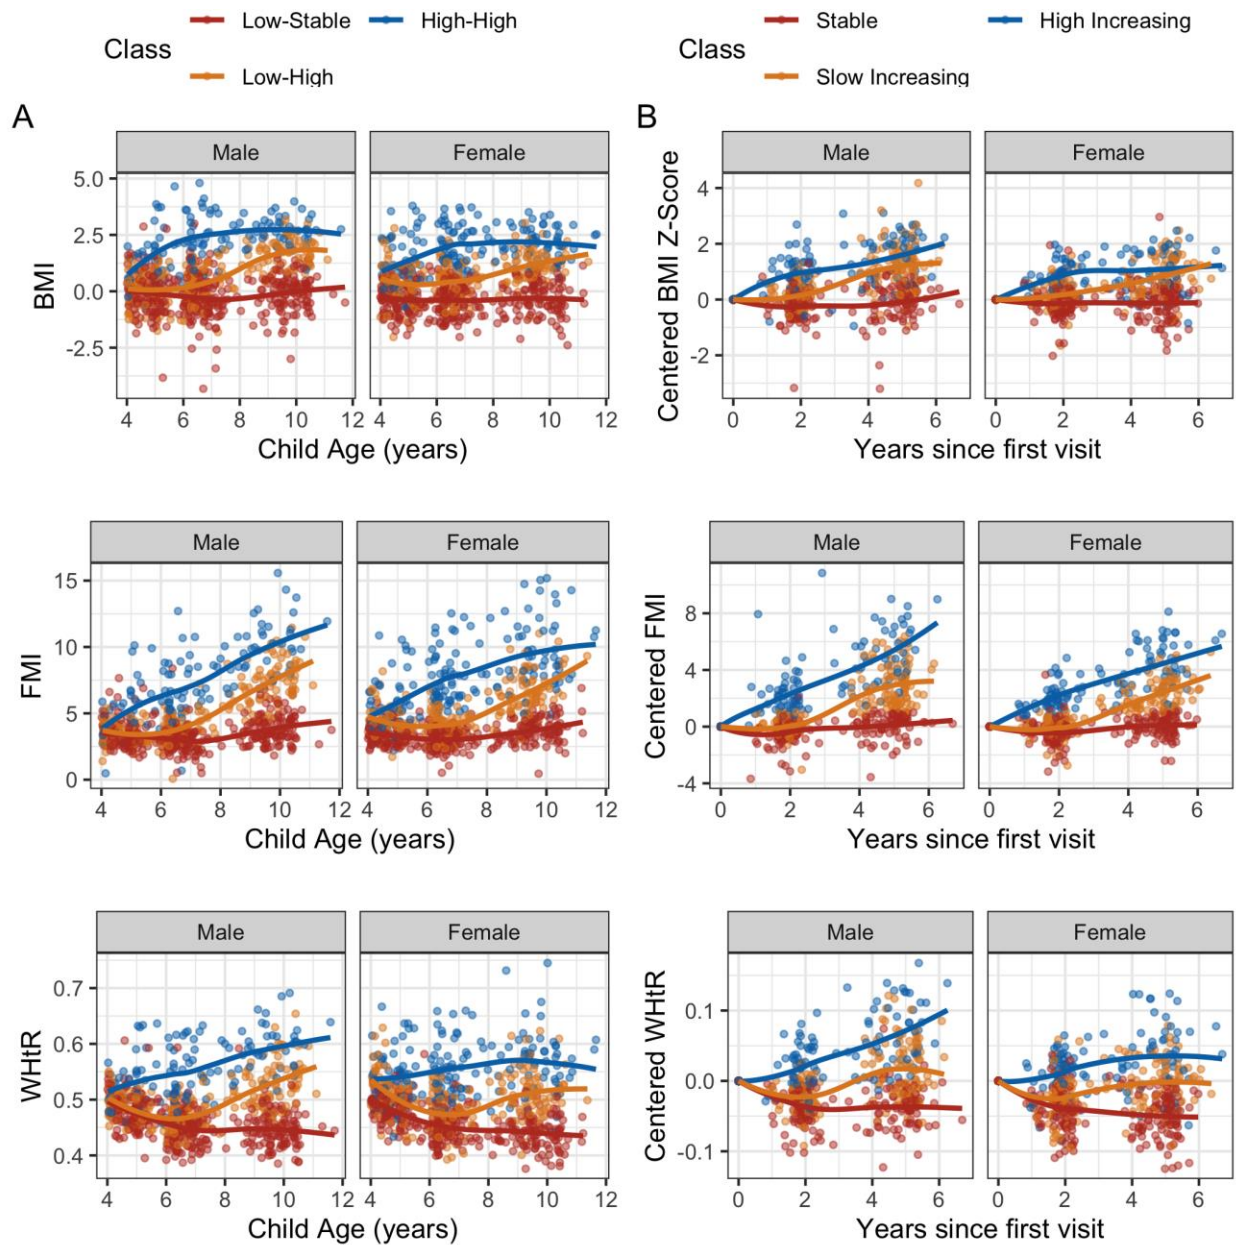

**Supplemental Figure S4.** Adiposity trajectory classes for male and female children identified by latent class growth modeling for A) non-centered BMI z-score, FMI and WHtR, and B) centered BMI-zscore, FMI, and WHtR. Colors indicate class membership (red: “low-stable”/”stable”, blue: “high-high”/”high-increasing” and orange: “low-high”/”slow increasing”) and smooth loess curves describe the trend of each trajectory. LCGM models for non-centered adiposity outcomes included linear and quadratic fixed effects for child age at follow-up, random intercepts for age and subject and link functions of 3 quantile splines on each adiposity outcome. LCGM models for centered adiposity outcomes included: linear and quadratic terms for age centered at the four-year visit, random intercepts for subject, 4 equidistant splines on BMI z-score and FMI, and a linear link function on WHtR.



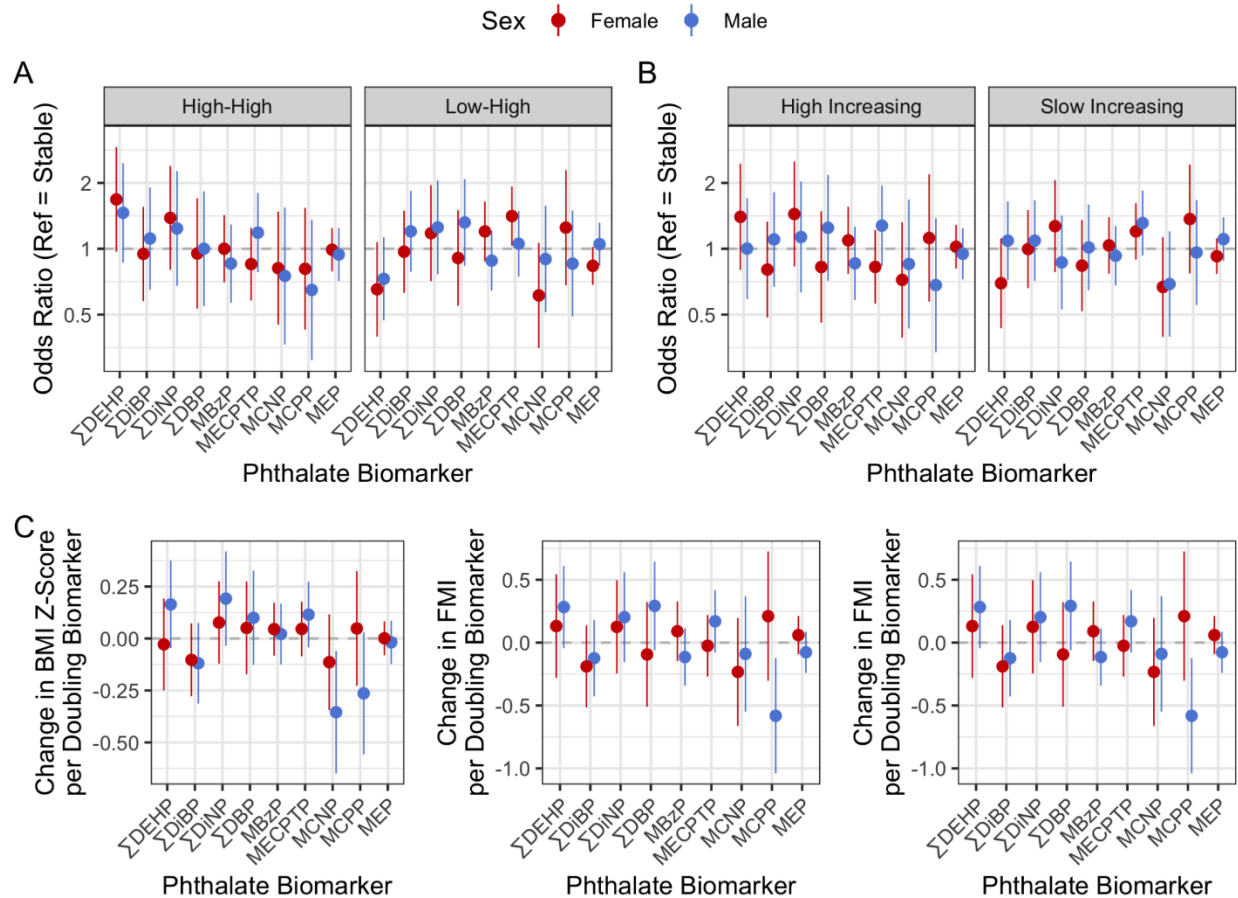

**Supplemental Figure S5.** Associations of sex-specific 2<sup>nd</sup> and 3<sup>rd</sup> trimester geometric mean urinary phthalate metabolites with A) non-centered adiposity trajectory classes, B) centered adiposity trajectory classes, and C) overall BMI z-score, fat mass index (FMI) and WHtR (waist-to-height ratio), using multinomial logistic regression with the “low-stable” and “stable” classes as the reference groups (A and B, respectively), or linear mixed-effects models (C). Models were stratified by child sex and color corresponds to sex-specific effect estimates (blue = male and red = female). Logistic regression model estimates are presented as odds ratios per doubling of metabolite concentrations with 95% confidence intervals (CI’s). Colors represent the comparison classes (blue: “high-high” or “high-stable”; yellow: “low-high” or “high increasing”). Linear mixed-effects models are presented as the change in outcome per doubling of phthalate biomarker with 95% CI’s. All models included all 9 phthalate biomarkers and were adjusted for maternal age, maternal pre-pregnancy BMI, parity, socioeconomic status, education, and date and phthalate measurement. Mixed-effects models were additionally adjusted for linear and quadratic terms for child age at visit.

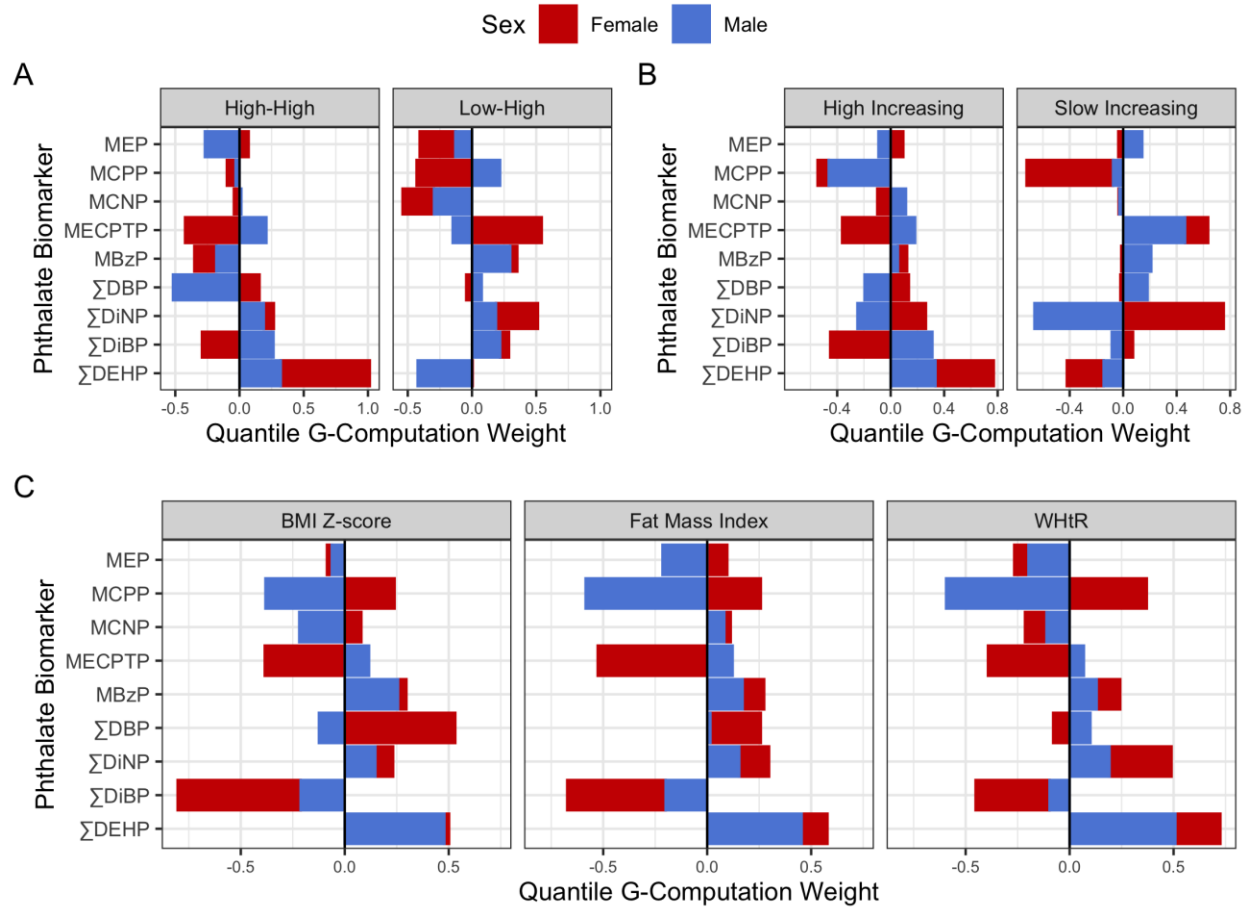

**Supplemental Figure S6.** Weights for associations of the total phthalates biomarker mixture with A) non-centered adiposity trajectories, B) centered adiposity trajectories, and C) longitudinal BMI Z-score, FMI and WHtR in females (red) and males (blue) as measured by quantile g-computation (N = 514).

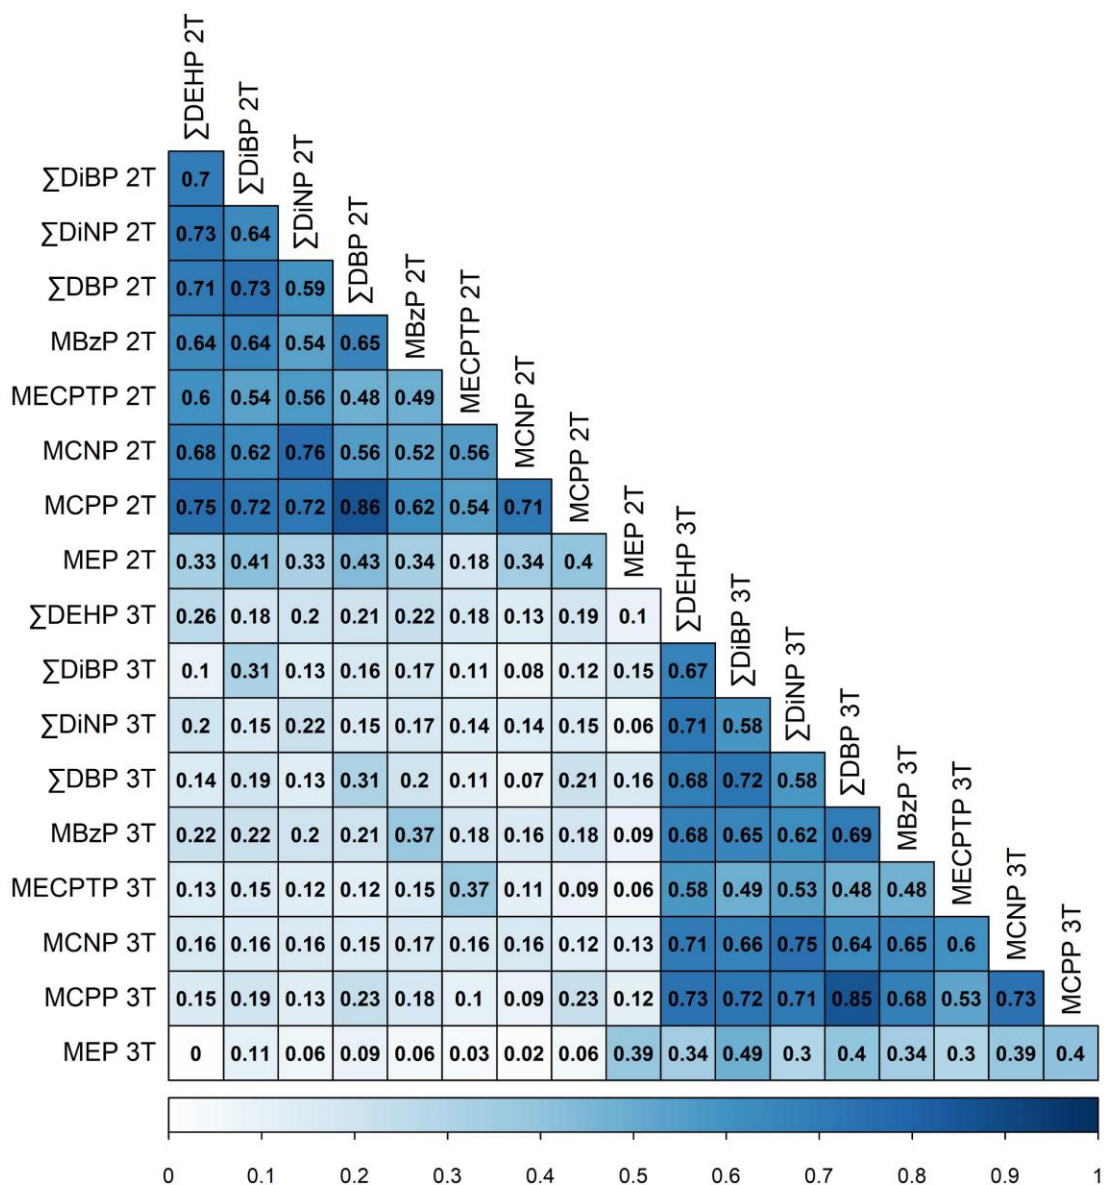

**Supplemental Figure S7.** Correlation plots between 2<sup>nd</sup> (2T) and 3<sup>rd</sup> (3T) phthalate biomarkers used in the present analysis. Gradient of cell indicates the strength of the Pearson correlation and the rho value is labeled in each cell.

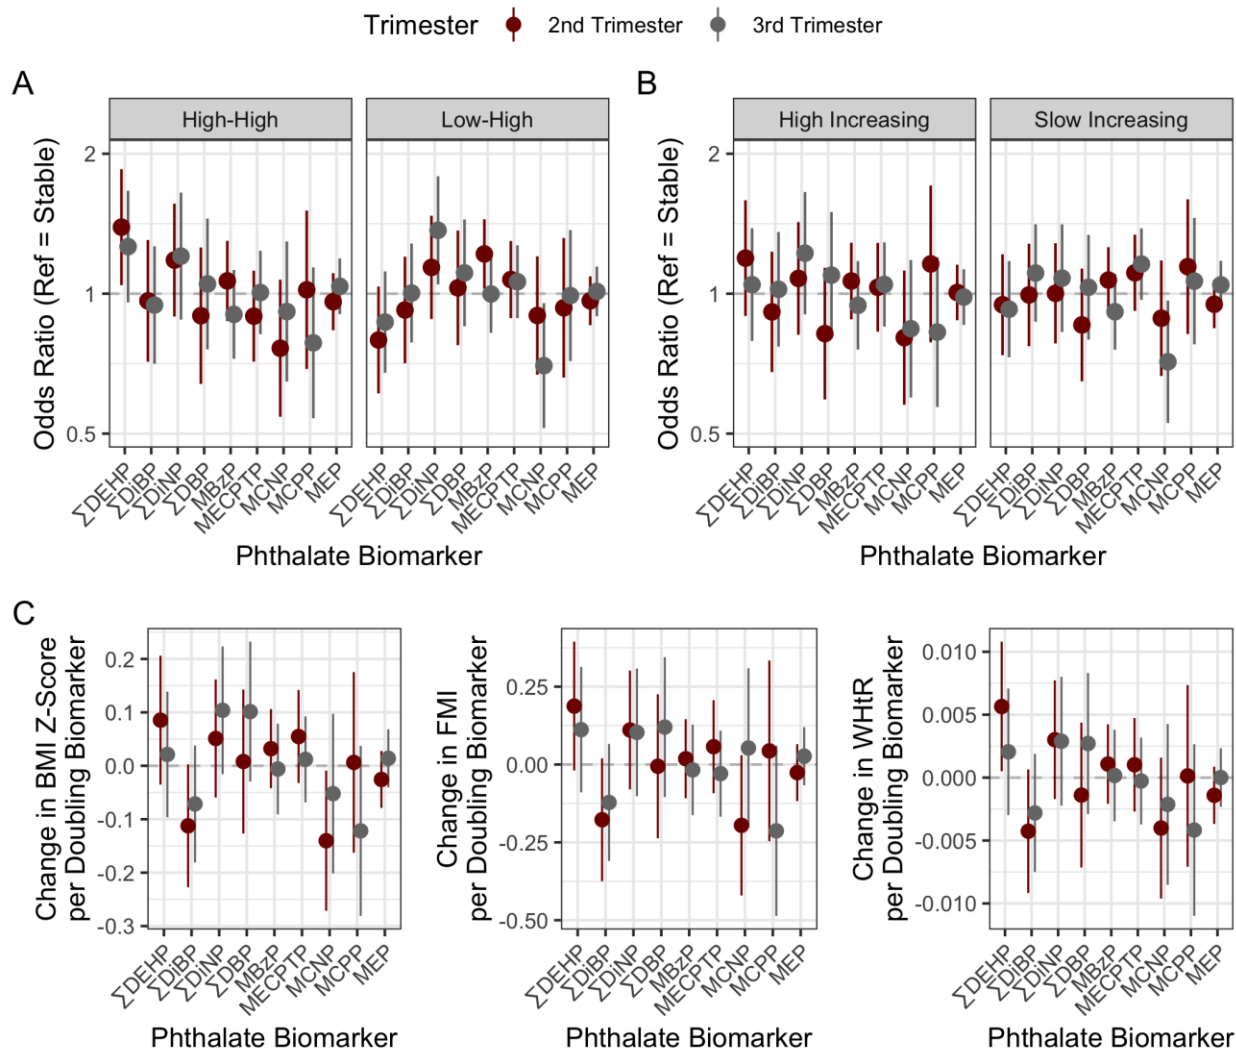

**Supplemental Figure S8.** Associations of 2<sup>nd</sup> (maroon) and 3<sup>rd</sup> trimester (gray) urinary phthalate metabolites with A) non-centered adiposity trajectory classes, B) centered adiposity trajectory classes, and C) overall BMI z-score, fat mass index (FMI) and WHtR (waist-to-height ratio), using multinomial logistic regression with the “low-stable” and “stable” classes as the reference groups (A and B, respectively), or linear mixed-effects models (C). Logistic regression model estimates are presented as odds ratios per doubling of metabolite concentrations with 95% confidence intervals (CI’s). Linear mixed-effects models are presented as the change in outcome per doubling of phthalate biomarker with 95% CI’s. All models included all 9 phthalate biomarkers and were adjusted for maternal age, maternal pre-pregnancy BMI, parity, socioeconomic status, education, child sex, and date and phthalate measurement. Mixed-effects models were additionally adjusted for linear and quadratic terms for child age at visit.

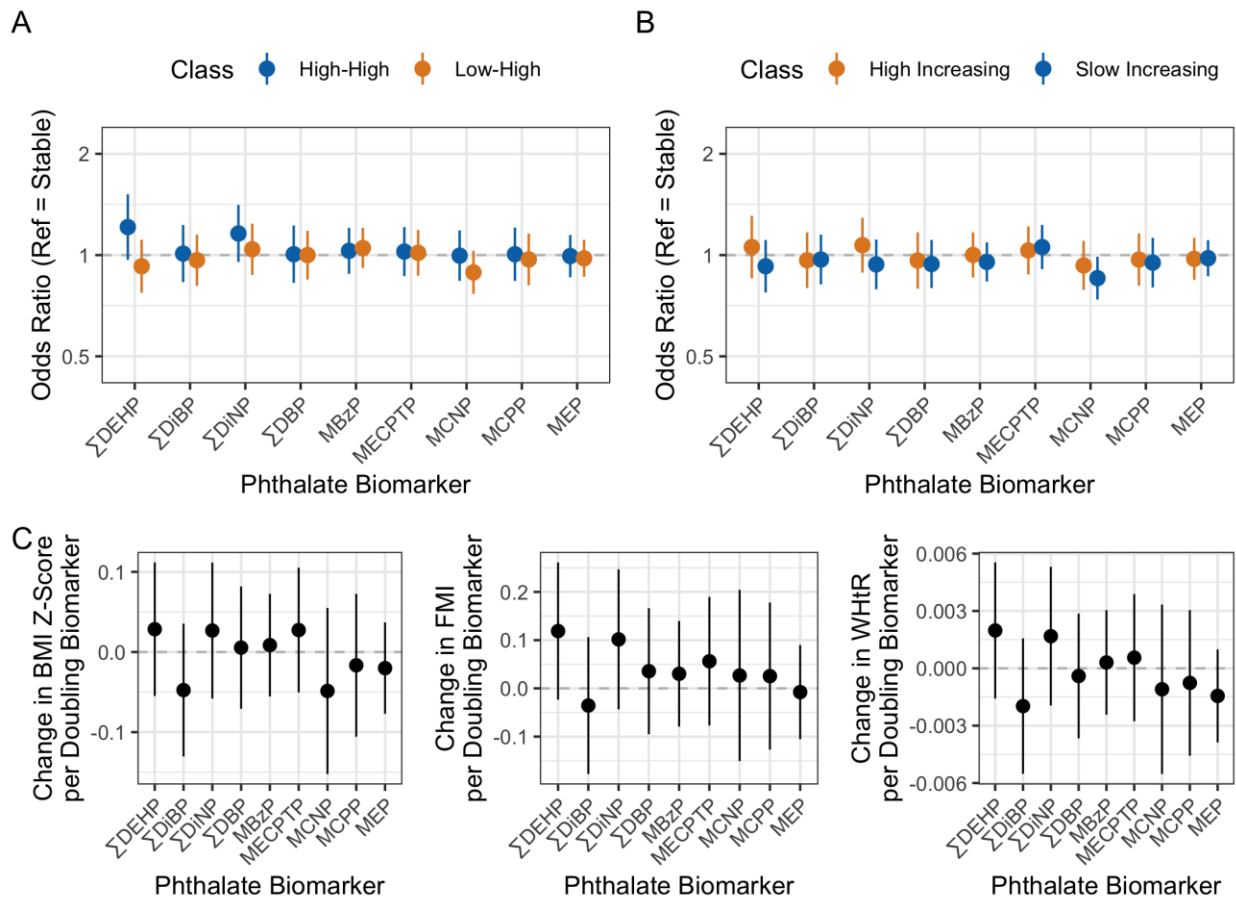

**Supplemental Figure S9.** Associations of 2<sup>nd</sup> and 3<sup>rd</sup> trimester geometric mean urinary phthalate metabolites with A) non-centered adiposity trajectory classes, B) centered adiposity trajectory classes, and C) overall BMI z-score, fat mass index (FMI) and WHtR (waist-to-height ratio), using multinomial logistic regression with the “low-stable” and “stable” classes as the reference groups (A and B, respectively), or linear mixed-effects models (C). Each phthalate was specified in a separate model. Logistic regression model estimates are presented as odds ratios per doubling of metabolite concentrations with 95% confidence intervals (CI’s). Colors represent the comparison classes (blue: “high-high” or “high-stable”; yellow: “low-high” or “high increasing”). Linear mixed-effects models are presented as the change in outcome per doubling of phthalate biomarker with 95% CI’s. All models were adjusted for maternal age, maternal pre-pregnancy BMI, parity, socioeconomic status, education, child sex, and date and phthalate measurement. Mixed-effects models were additionally adjusted for linear and quadratic terms for child age at visit.

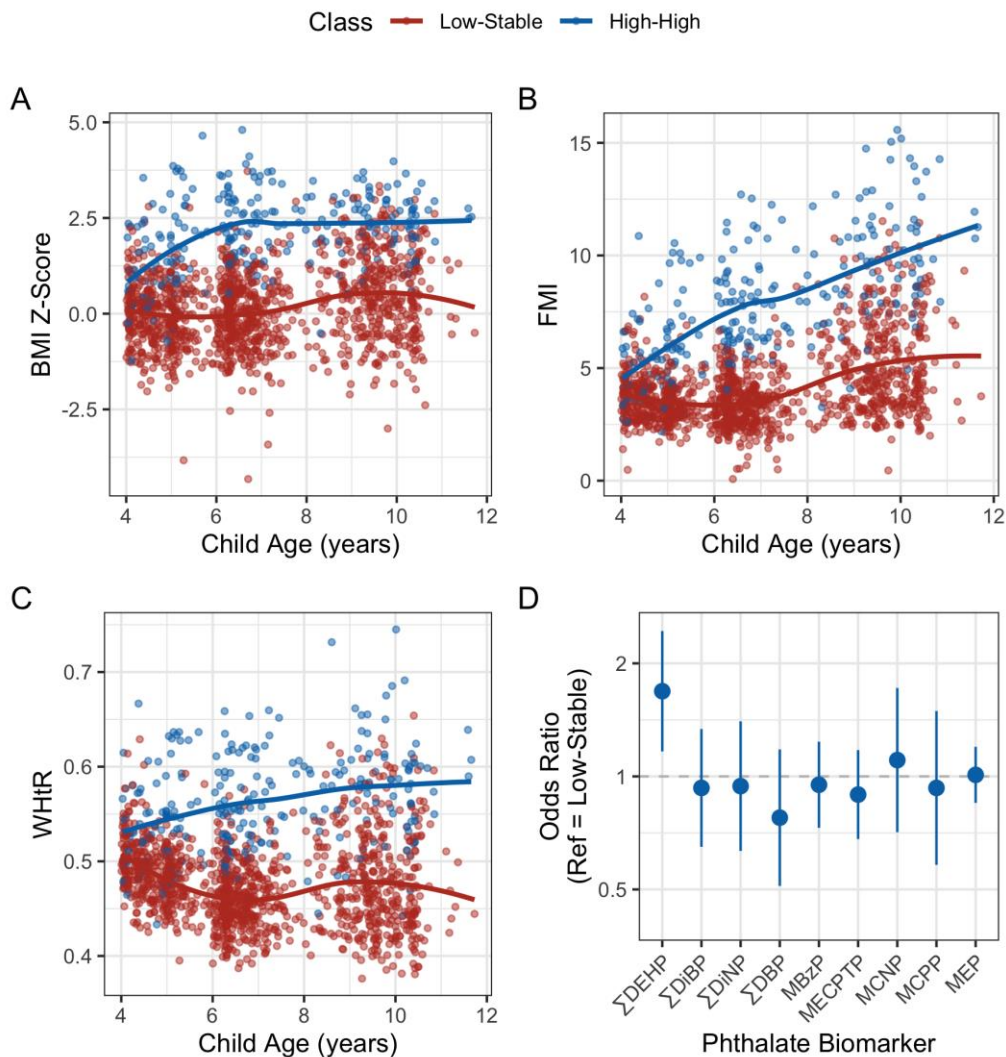

**Supplemental Figure S10.** Two-class adiposity trajectories identified by latent class growth modeling for A) non-centered BMI z-score, B) FMI and C) WHtR. D) Associations of 2<sup>nd</sup> and 3<sup>rd</sup> trimester geometric mean urinary phthalate metabolites with membership in the “high-high” class in comparison to the “low-stable” class using logistic regression. Colors indicate class membership (red: “low-stable”, blue: “high-high”) and smooth loess curves describe the trend of each trajectory.

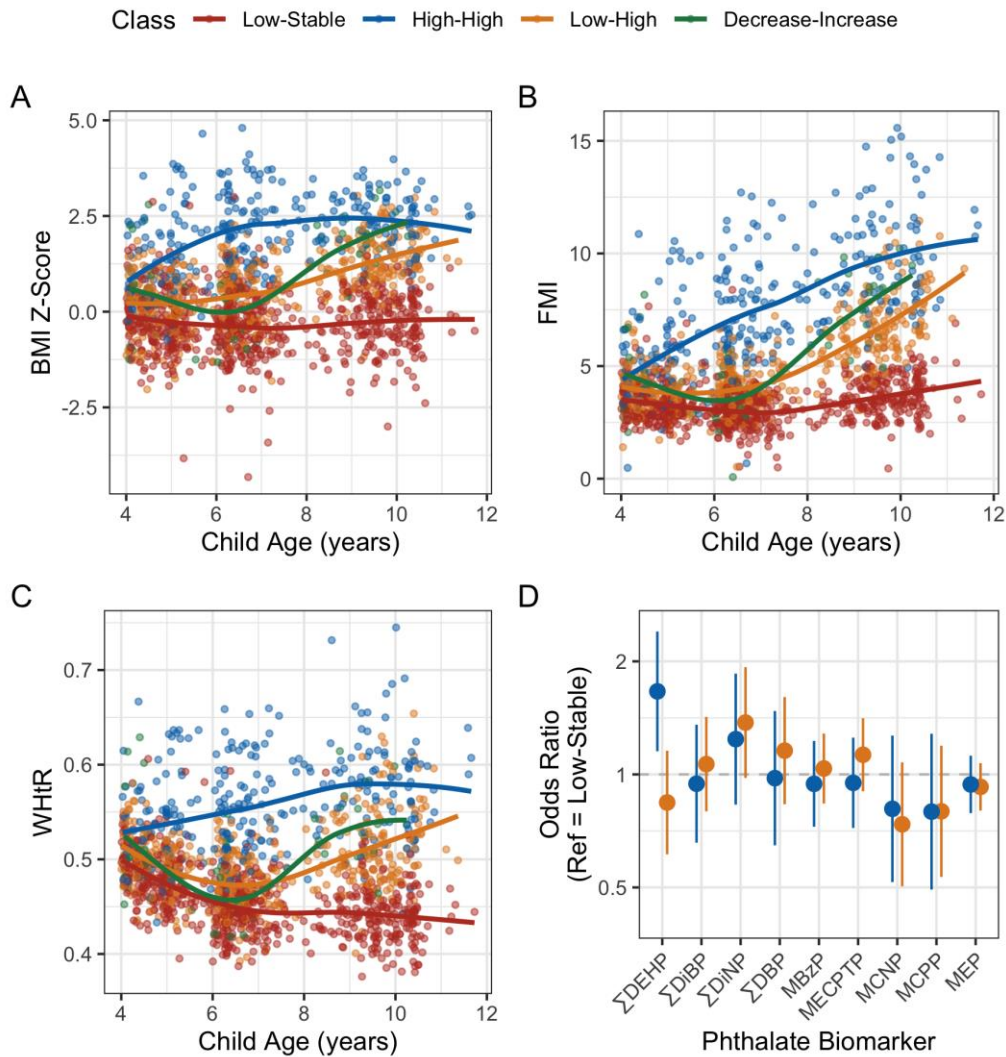

**Supplemental Figure S11.** Four-class adiposity trajectories identified by latent class growth modeling for A) non-centered BMI z-score, B) FMI and C) WHtR. D) Associations of geometric mean urinary phthalate metabolites with membership in the “high-high” class and the “low-high” class in comparison to the “low-stable” class using multinomial logistic regression. Colors indicate class membership (red: “low-stable”, blue: “high-high”, yellow: “low-high”, green: “decrease-increase”) and smooth loess curves describe the trend of each trajectory.

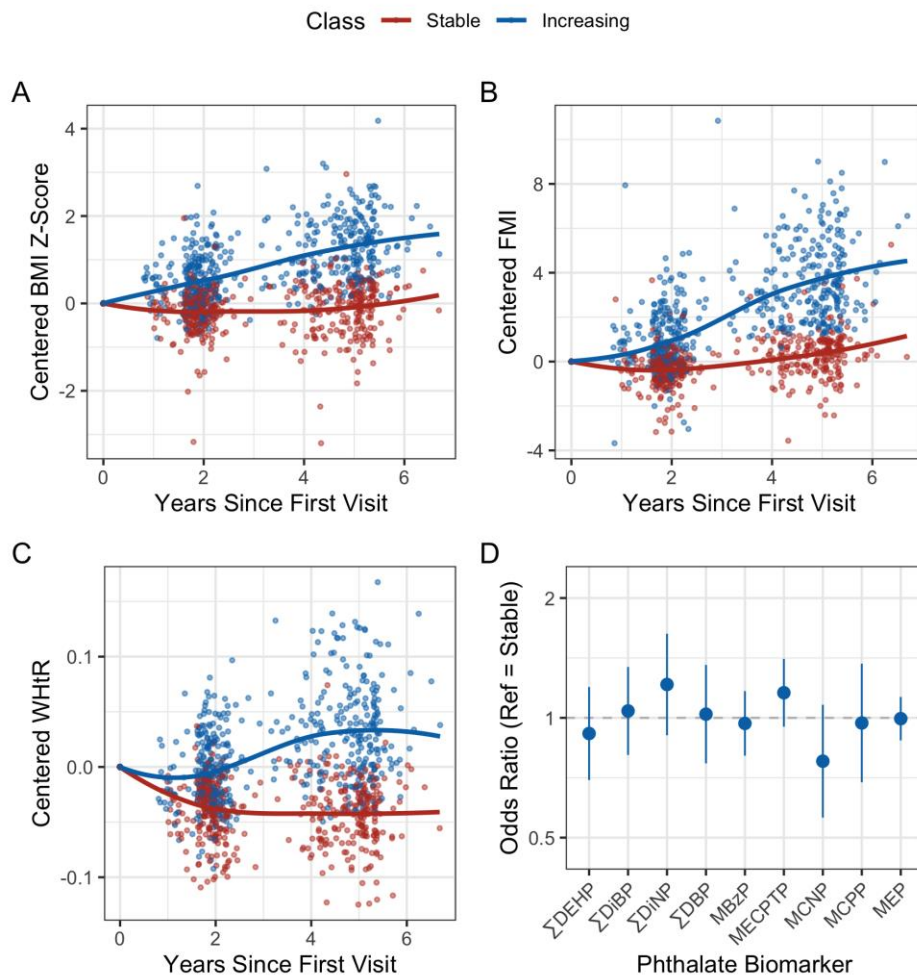

**Supplemental Figure S12.** Two-class adiposity trajectories identified by latent class growth modeling for A) centered BMI z-score, B) centered FMI and C) centered WHtR. D) Associations of geometric mean urinary phthalate metabolites with membership in the “increasing” class in comparison to the “stable” class using logistic regression. Colors indicate class membership (red: “stable”, blue: “increasing”) and smooth loess curves describe the trend of each trajectory.



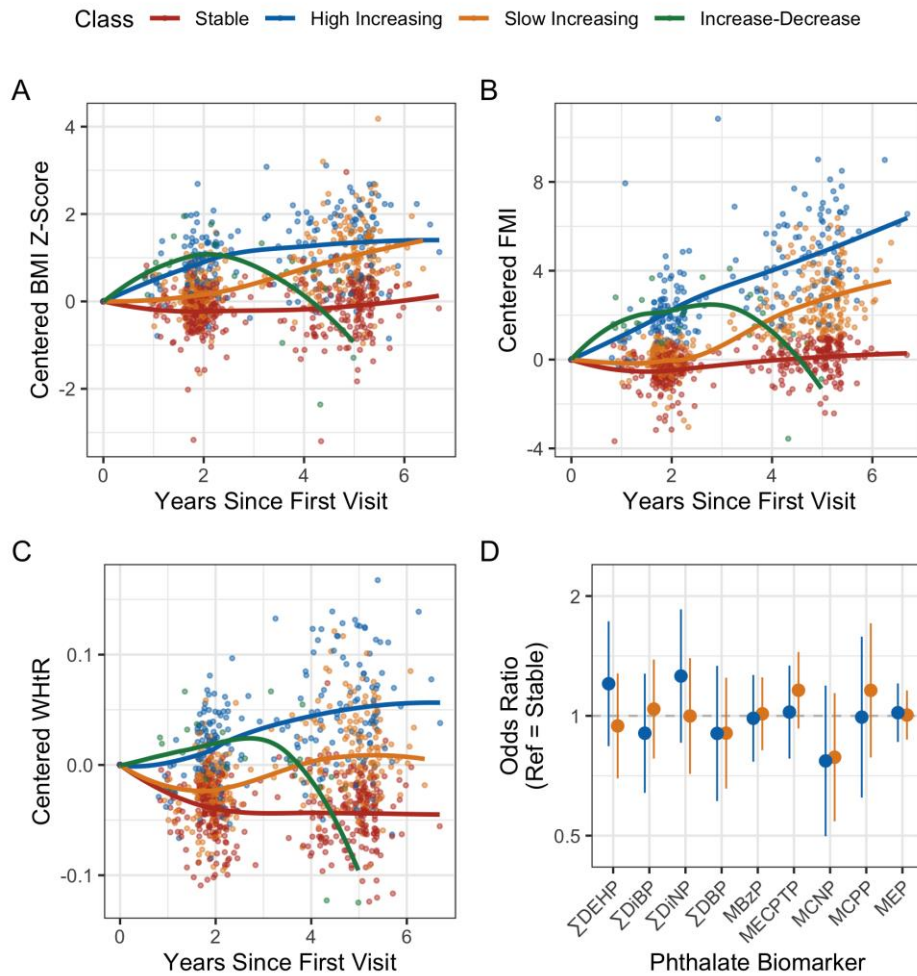

**Supplemental Figure S13.** Four-class adiposity trajectories identified by latent class growth modeling for A) centered BMI z-score, B) centered FMI and C) centered WHtR. D) Associations of geometric mean urinary phthalate metabolites with membership in the “high increasing” class and the “slow increasing” class in comparison to the “stable” class using multinomial logistic regression. Colors indicate class membership (red: “stable”, blue: “high increasing”, yellow: “slow increasing”, green: “increase-decrease”) and smooth loess curves describe the trend of each trajectory.
